# Supplementary material
Source: PubMed Central journal article supplement (PMC1142613)
Supplement: 7600684s1.pdf [file 7600684s1.pdf]

## Supplementary Methods

### *Protein homology searches*

A variety of publicly available and commercial databases were used to search for homologues to the *RMII* gene and protein sequences, including NCBI (<http://www.ncbi.nlm.nih.gov>); SGD (Saccharomyces Genome Database, (Christie et al., 2004)); Ensembl (<http://www.ensembl.org>, (Hubbard et al., 2002)) genome assemblies; Celera (<http://www.celera.com>, (Kerlavage et al., 2002)) human and mouse genome assemblies; DOE Joint Genome Institute fugu genome assembly (<http://www.jgi.doe.gov/fugu/index.html>); tetraodon (*Tetraodon nigroviridis*) reads and genome assembly at GENOSCOPE (<http://www.genoscope.cns.fr/externe/tetraodon/>); and the sea squirt (*Ciona savignyi*) genome at the Center for Genome Research at Whitehead institute (<http://www-genome.wi.mit.edu/annotation/ciona/background.html>) and at the DOE Joint Genome Institute (<http://www.jgi.doe.gov/programs/ciona.htm>).

Programs used for homology searches were: BLAST (local generic and on the Paracel Blaster system (Paracel, Inc.), and web implementations), Smith-Waterman algorithm for identifying remote homologues (implemented at Paracel GeneMatcher2), and BLAT (web implementation). GeneMatcher2 was also used for Hidden Markov Model searches. Alignments were produced using ClustalW (Chenna et al., 2003) and ClustalX, and shaded using BOXSHADE. The OB-fold nucleic acid binding domain family is Pfam accession number PF01336.

## REFERENCES

- Chenna, R., Sugawara, H., Koike, T., Lopez, R., Gibson, T.J., Higgins, D.G. and Thompson, J.D. (2003) Multiple sequence alignment with the Clustal series of programs. *Nucleic Acids Res*, **31**, 3497-3500.
- Christie, K.R., Weng, S., Balakrishnan, R., Costanzo, M.C., Dolinski, K., Dwight, S.S., Engel, S.R., Feierbach, B., Fisk, D.G., Hirschman, J.E., Hong, E.L., Issel-Tarver, L., Nash, R., Sethuraman, A., Starr, B., Theesfeld, C.L., Andrada, R., Binkley, G., Dong, Q., Lane, C., Schroeder, M., Botstein, D. and Cherry, J.M. (2004) Saccharomyces Genome Database (SGD) provides tools to identify and analyze sequences from *Saccharomyces cerevisiae* and related sequences from other organisms. *Nucleic Acids Res*, **32**, D311-314.
- Hubbard, T., Barker, D., Birney, E., Cameron, G., Chen, Y., Clark, L., Cox, T., Cuff, J., Curwen, V., Down, T., Durbin, R., Eyras, E., Gilbert, J., Hammond, M., Huminiecki, L., Kasprzyk, A., Lehvaslaiho, H., Lijnzaad, P., Melsopp, C., Mongin, E., Pettett, R., Pocock, M., Potter, S., Rust, A., Schmidt, E., Searle, S., Slater, G., Smith, J., Spooner, W., Stabenau, A., Stalker, J., Stupka, E., Ureta-Vidal, A., Vastrik, I. and Clamp, M. (2002) The Ensembl genome database project. *Nucleic Acids Res*, **30**, 38-41.
- Kerlavage, A., Bonazzi, V., di Tommaso, M., Lawrence, C., Li, P., Mayberry, F., Mural, R., Nodell, M., Yandell, M., Zhang, J. and Thomas, P. (2002) The Celera Discovery System. *Nucleic Acids Res*, **30**, 129-136.

Table S1. *Saccharomyces cerevisiae* strains used in this study.

| Strain | Genotype                                                                                                                                                                                                                                                                                       | Source                  |
|--------|------------------------------------------------------------------------------------------------------------------------------------------------------------------------------------------------------------------------------------------------------------------------------------------------|-------------------------|
| Y5646  | <i>MAT<math>\square</math> rmi1<math>\Delta</math>::natR lyp1<math>\Delta</math> can1<math>\Delta</math>::MFA1pr-HIS3-MF<math>\square</math>1pr-LEU2 his3<math>\Delta</math>1 leu2<math>\Delta</math>0 ura3<math>\Delta</math>0 met15<math>\Delta</math>0 LYS2</i>                             | This study              |
| BY4741 | <i>MATa his3<math>\Delta</math>1 leu2<math>\Delta</math>0 ura3<math>\Delta</math>0 met15<math>\Delta</math>0</i>                                                                                                                                                                               | (Brachmann et al. 1998) |
| BY4742 | <i>MAT<math>\square</math> his3<math>\Delta</math>1 leu2<math>\Delta</math>0 ura3<math>\Delta</math>0 lys2<math>\Delta</math>0</i>                                                                                                                                                             | (Brachmann et al. 1998) |
| MCY304 | BY4742 with <i>MATa rmi1<math>\Delta</math>::kanMX6</i>                                                                                                                                                                                                                                        | This study              |
| MCY16  | <i>MAT<math>\square</math> rad53-11-URA3 can1<math>\Delta</math>::MFApr-HIS3 his3<math>\Delta</math>1 leu2<math>\Delta</math>0 ura3<math>\Delta</math>0 lys2<math>\Delta</math>0</i>                                                                                                           | (Chang et al. 2002)     |
| MCY352 | BY4742 with <i>SGS1-3HA-LEU2</i>                                                                                                                                                                                                                                                               | This study              |
| MCY312 | BY4741 with <i>RMII-TAP-HIS3</i>                                                                                                                                                                                                                                                               | This study              |
| MCY353 | BY4741 with <i>MAT<math>\square</math> SGS1-3HA-LEU2 RMII-TAP-HIS3</i>                                                                                                                                                                                                                         | This study              |
| MCY348 | BY4742 with <i>TOP3-V5-VSV-kanMX6</i>                                                                                                                                                                                                                                                          | I. Stagljar             |
| MCY355 | BY4741 with <i>MET15 TOP3-V5-VSV-kanMX6 RMII-TAP-HIS3</i>                                                                                                                                                                                                                                      | This study              |
| MCY356 | BY4742 with <i>LYS2 TOP3-V5-VSV-kanMX6 RMII-TAP-HIS3 sgs1<math>\Delta</math>::kanMX6</i>                                                                                                                                                                                                       | This study              |
| MCY365 | BY4741 with <i>MAT<math>\square</math> SGS1-3HA-LEU2 TOP3-TAP-HIS3 rmi1<math>\Delta</math>::kanMX6</i>                                                                                                                                                                                         | This study              |
| MCY367 | BY4741 with <i>MAT<math>\square</math> SGS1-3HA-LEU2 RMII-TAP-HIS3 top3<math>\Delta</math>::kanMX6</i>                                                                                                                                                                                         | This study              |
| MCY372 | BY4741 with <i>sgs1::kanMX6</i> (pRS415)                                                                                                                                                                                                                                                       | This study              |
| MCY373 | BY4741 with <i>sgs1::kanMX6</i> (pSM100-HA)                                                                                                                                                                                                                                                    | This study              |
| MCY374 | BY4741 with <i>sgs1::kanMX6</i> (pSM100-hd-HA)                                                                                                                                                                                                                                                 | This study              |
| MCY375 | MCY356 (pSM100-HA)                                                                                                                                                                                                                                                                             | This study              |
| MCY376 | MCY356 (pSM100-hd-HA)                                                                                                                                                                                                                                                                          | This study              |
| MCY377 | BY4742 with <i>LYS2 TOP3-V5-VSV-kanMX6 rmi1<math>\Delta</math>::natMX6 sgs1<math>\Delta</math>::kanMX6</i> (pSM100-HA)                                                                                                                                                                         | This study              |
| MCY378 | BY4742 with <i>LYS2 TOP3-V5-VSV-kanMX6 rmi1<math>\Delta</math>::natMX6 sgs1<math>\Delta</math>::kanMX6</i> (pSM100-hd-HA)                                                                                                                                                                      | This study              |
| MCY379 | BY4742 with <i>LYS2 top3<math>\Delta</math>::natMX6 RMII-TAP-HIS3 sgs1<math>\Delta</math>::kanMX6</i> (pSM100-HA)                                                                                                                                                                              | This study              |
| MCY380 | BY4742 with <i>LYS2 top3<math>\Delta</math>::natMX6 RMII-TAP-HIS3 sgs1<math>\Delta</math>::kanMX6</i> (pSM100-hd-HA)                                                                                                                                                                           | This study              |
| MCY357 | BY4741 (pWJ1344)                                                                                                                                                                                                                                                                               | This study              |
| MCY358 | MCY304 (pWJ1344)                                                                                                                                                                                                                                                                               | This study              |
| MCY328 | BY4741 with <i>top3<math>\Delta</math>::kanMX6</i>                                                                                                                                                                                                                                             | This study              |
| MCY359 | MCY328 (pWJ1344)                                                                                                                                                                                                                                                                               | This study              |
| MCY360 | BY4741 with <i>sgs1<math>\Delta</math>::kanMX6</i> (pWJ1344)                                                                                                                                                                                                                                   | This study              |
| RDY9   | <i>MATa mfa1::MFA1pr-HIS3 can1<math>\Delta</math>::natR leu2<math>\Delta</math>EcoRI::URA3-HOCs::leu2<math>\Delta</math>BstII leu2<math>\Delta</math>0 his3<math>\Delta</math>0 ura3<math>\Delta</math>0 met15<math>\Delta</math>0 lyp1<math>\Delta</math></i>                                 | This study              |
| RDY10  | <i>MATa sgs1<math>\Delta</math>::kanMX6 mfa1::MFA1pr-HIS3 can1<math>\Delta</math>::natR leu2<math>\Delta</math>EcoRI::URA3-HOCs::leu2<math>\Delta</math>BstII leu2<math>\Delta</math>0 his3<math>\Delta</math>0 ura3<math>\Delta</math>0 met15<math>\Delta</math>0 lyp1<math>\Delta</math></i> | This study              |
| RDY14  | <i>MATa rmi1<math>\Delta</math>::kanMX6 mfa1::MFA1pr-HIS3 can1<math>\Delta</math>::natR leu2<math>\Delta</math>EcoRI::URA3-HOCs::leu2<math>\Delta</math>BstII leu2<math>\Delta</math>0 his3<math>\Delta</math>0 ura3<math>\Delta</math>0 met15<math>\Delta</math>0 lyp1<math>\Delta</math></i> | This study              |
| RDY15  | <i>MATa top3<math>\Delta</math>::kanMX6 mfa1::MFA1pr-HIS3 can1<math>\Delta</math>::natR leu2<math>\Delta</math>EcoRI::URA3-HOCs::leu2<math>\Delta</math>BstII leu2<math>\Delta</math>0 his3<math>\Delta</math>0 ura3<math>\Delta</math>0 met15<math>\Delta</math>0 lyp1<math>\Delta</math></i> | This study              |
| CZY106 | <i>MATa mfa1::MFA1pr-HIS3 hxt13<math>\Delta</math>::URA3 his3<math>\Delta</math>1 ura3<math>\Delta</math>0 lyp1<math>\Delta</math> leu2<math>\Delta</math>0 met15<math>\Delta</math>0</i>                                                                                                      | This study              |
| CZY211 | <i>MATa sgs1<math>\Delta</math>::kanMX6 mfa1::MFA1pr-HIS3 hxt13<math>\Delta</math>::URA3 his3<math>\Delta</math>1 ura3<math>\Delta</math>0 lyp1<math>\Delta</math> leu2<math>\Delta</math>0 met15<math>\Delta</math>0</i>                                                                      | This study              |
| CZY232 | <i>MATa sgs1<math>\Delta</math>::natR mfa1::MFA1pr-HIS3 hxt13<math>\Delta</math>::URA3 his3<math>\Delta</math>1 ura3<math>\Delta</math>0 lyp1<math>\Delta</math> leu2<math>\Delta</math>0 met15<math>\Delta</math>0</i>                                                                        | This study              |

|        |                                                                                                                                |            |
|--------|--------------------------------------------------------------------------------------------------------------------------------|------------|
| CZY212 | <i>MATa top3Δ::kanMX6 mfa1::MFA1pr-HIS3 hxt13Δ::URA3 his3Δ1 ura3Δ0 lyp1Δ leu2Δ0 met15Δ0</i>                                    | This study |
| CZY213 | <i>MATa rmi1Δ::kanMX6 mfa1::MFA1pr-HIS3 hxt13Δ::URA3 his3Δ1 ura3Δ0 lyp1Δ leu2Δ0 met15Δ0</i>                                    | This study |
| MCY340 | <i>BY4741 with can1Δ::MFA1-HIS3 rmi1Δ::natMX6</i>                                                                              | This study |
| MCY323 | <i>BY4741 with lyp1Δ rmi1Δ::natMX6 sgs1Δ::kanMX6</i>                                                                           | This study |
| MCY335 | <i>BY4741 with sgs1Δ::kanMX6 top3Δ::natMX6</i>                                                                                 | This study |
| MCY345 | <i>BY4741 with sgs1Δ::kanMX6 top3Δ::kanMX6 rmi1Δ::natMX6</i>                                                                   | This study |
| MCY297 | <i>MATa/MAT□ his3Δ1/his3Δ1 leu2Δ0/leu2Δ0 ura3Δ0/ura3Δ0 MET15/met15Δ0 LYS2/lys2Δ0</i>                                           | This study |
| MCY370 | <i>MATa/MAT□ rmi1Δ::kanMX6/rmi1Δ::natMX6 his3Δ1/his3Δ1 leu2Δ0/leu2Δ0 ura3Δ0/ura3Δ0 met15Δ0/met15Δ0 LYS2/lys2Δ0 LYP1/lyp1Δ0</i> | This study |
| GBY635 | <i>SGS1-3HA-LEU2 TOP3-V5-VSV-kanMX6 RMI1-TAP-HIS3 leu2Δ0 his3Δ1 ura3Δ0</i>                                                     | This study |

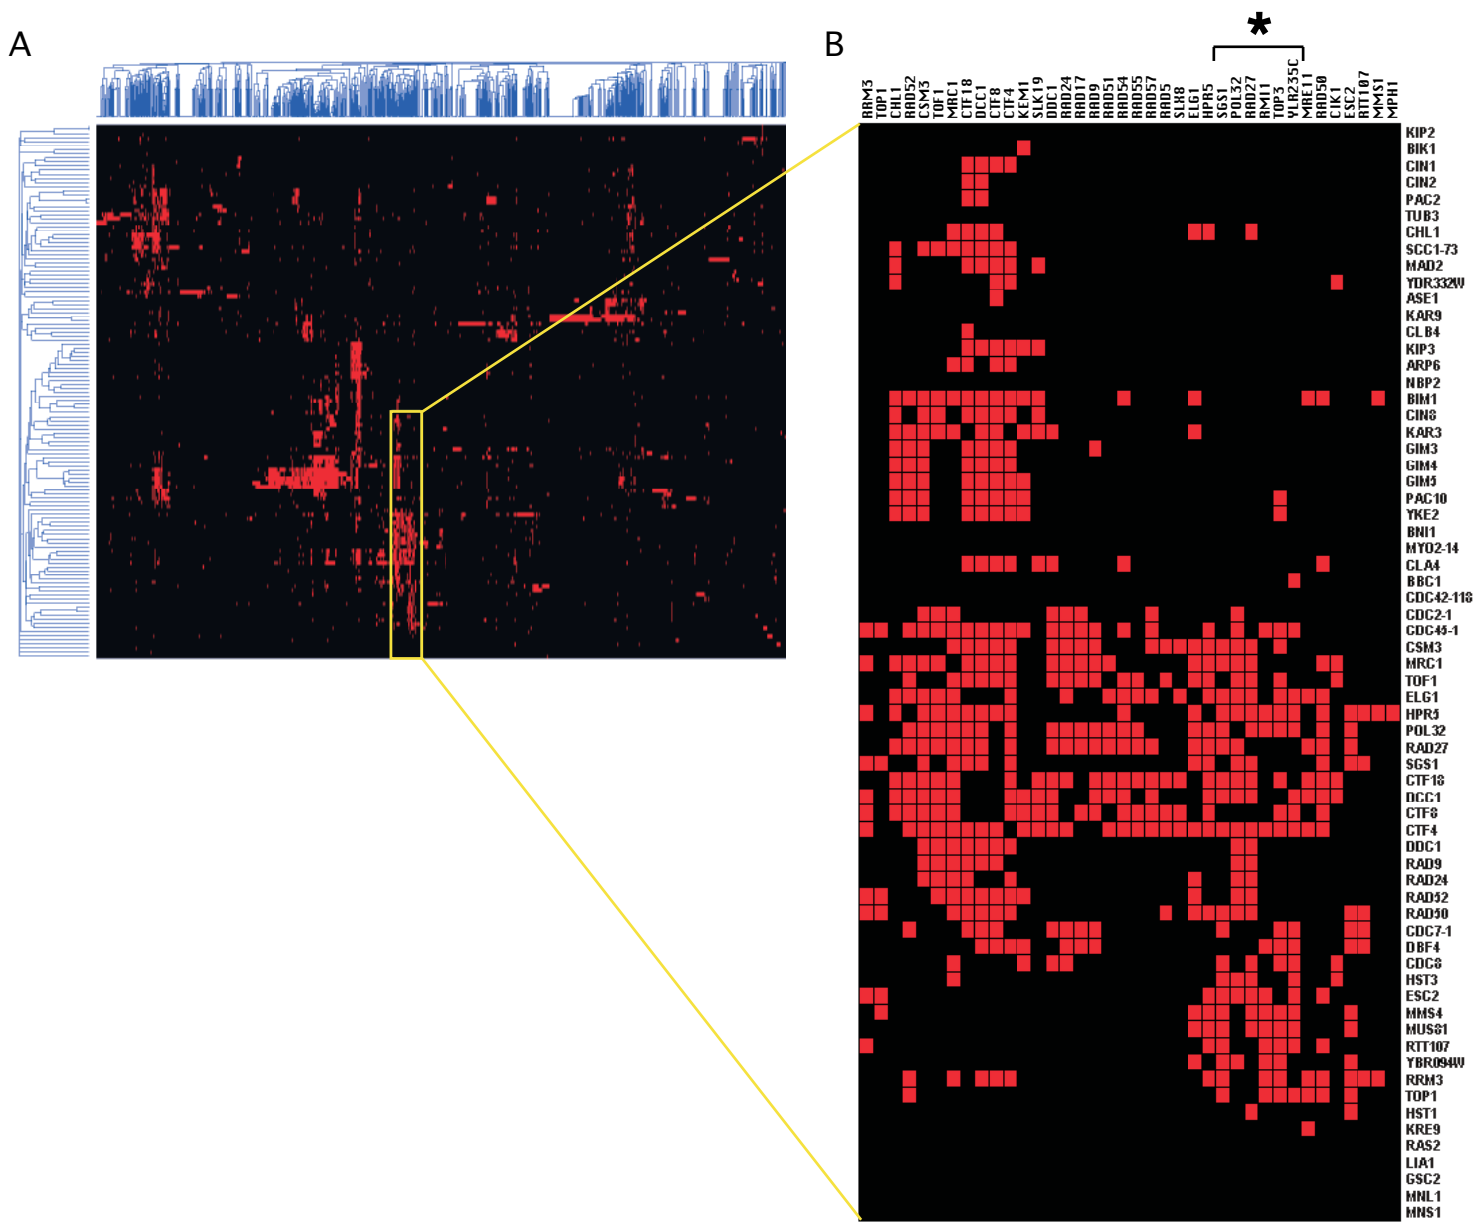

**Figure S1.** Two-dimensional hierarchical clustering of synthetic genetic interactions determined by SGA analysis (Tong et al., 2004). (A) Synthetic genetic interactions are represented as red lines. Rows, 132 query genes; columns, 1007 array genes. The cluster trees organize query (y-axis) and array genes (x-axis) that show similar patterns of genetic interactions. (B) The relevant section (yellow outline in A) is expanded to allow visualization of the *RMII/SGS1/TOP3* array gene cluster. Synthetic genetic interactions are represented as red squares.

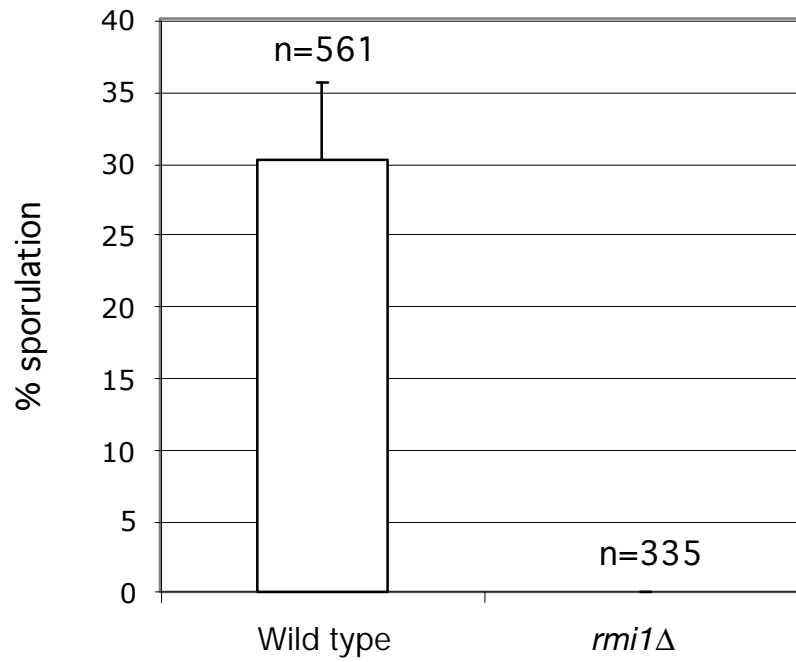

**Figure S2.** *rmi1*Δ/*rmi1*Δ diploids are sporulation defective. Sporulation efficiency was determined following 5 days in sporulation medium at 30°C. The value presented for each strain is the average of three trials.

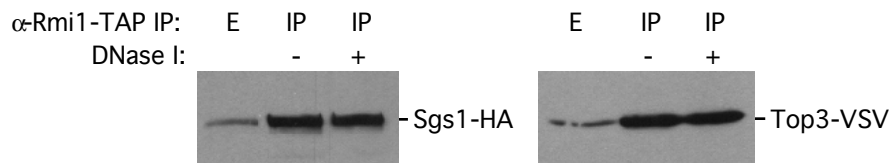

**Figure S3.** The Rmi1-Sgs1 and Rmi1-Top3 interactions are not mediated by DNA. Extract from a yeast strain expressing Sgs1-HA, Top3-VSV, and Rmi1-TAP was immunoprecipitated with IgG agarose following incubation for 15 minutes in the presence (+) or absence (-) of 10U of DNase I and 10 mM MgCl<sub>2</sub>. Ten percent of the input extract (E) and the entire immunoprecipitate (IP) were fractionated by SDS-PAGE. Immunoblots were probed with anti-HA antibody to detect Sgs1 and with anti-VSV antibody to detect Top3.

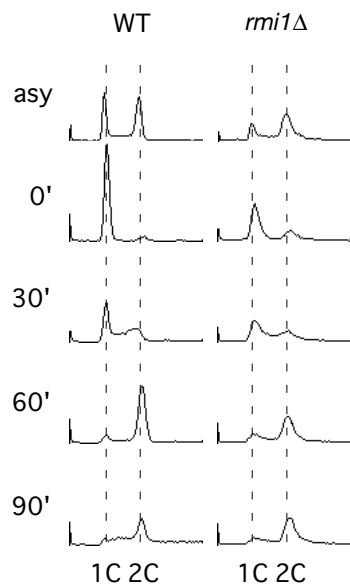

**Figure S4.** Wild-type or *rmi1Δ* cells were arrested in G1 (t = 0) and released synchronously into fresh YPD medium. Samples were removed at the indicated times and analyzed by flow cytometry. The positions of cells with 1C and 2C DNA contents are indicated.



|        |     |                                                                |
|--------|-----|----------------------------------------------------------------|
| KlRmi1 | 1   | -----MTSDLRKVDITTVTNVLEDPN----SLIVKAFN                         |
| AgRmi1 | 1   | -----MGSGVTVLSADITQLTEEQVNAGPDGAVGTLLEKEAYQ                    |
| Rmi1   | 1   | -----MSFSSILSQDITDDITPPAYSATLGSREQIVFRAYQ                      |
| CaRmi1 | 1   | -----                                                          |
| NcRmi1 | 1   | METARTLHRQLTTDSHTTFLPIPSLSWLTTLLIPSTTSRNIPPLPSLLATARLRLLSSDLS  |
| MgRmi1 | 1   | ---MDEAASQIRASLISQCLPPSQNWLSKILLS-TRPQPLPPLPSLTATAKARLLAADLT   |
| SpRmi1 | 1   | ----MNQTTTLSTELTELGVVRVQNRWLSLLDYLAKKHSTGANTPQLVMQYLVASDIR     |
| I      |     |                                                                |
| KlRmi1 | 30  | NETWPT-----KDFQRKLIITVNRPLLFQVCMIENISRSKLTQVDE                 |
| AgRmi1 | 38  | SAVWGG-----EGREQRCQAVNRKLLFQVCMVENVSRSLAQVDE                   |
| Rmi1   | 37  | NEPWLAG-----TASNLIIDKKLVIVDRRELLFQVLMVENITKSKLTQIDD            |
| CaRmi1 | 1   | -----MEELKLDIRSTKFLVISIENISKSRNLNQLLE                          |
| NcRmi1 | 61  | TPGLLDPSYVSSHSFPPSLTSGQQHPPTGYPKDQTLFQDVLVQVLDIVNLSRSKWEVVEE   |
| MgRmi1 | 57  | SPDLLDRAG-----ASPFPPAASPETKETRLARDVVVQVLDIENLSRSRWEQVEE        |
| SpRmi1 | 56  | ESTTSEG-----AAPYIVSEQHNVRIENTMLLQIVRVREIGISIVNQLLEY            |
| II     |     |                                                                |
| KlRmi1 | 71  | LQVVI---DPRRQKVDRLSTSRD-----RQQLISEVNLDDDDDDGTTSYHNNSGVGNQDS   |
| AgRmi1 | 79  | YHVRL---APRKQMVDRVGAG-----KELVSVQVSDSDSNQ-PAADERQ--AP----      |
| Rmi1   | 82  | IKTKL---DPKKQKVDRLRSGAQNGAKKYEVIQVDMEDDGNVADRNNCAKENSNNNS      |
| CaRmi1 | 31  | WKQLD---NPNKSSVDRLNRK-----IITEVNLNNDDEDNDESGRPSRANTQDTY        |
| NcRmi1 | 121 | LESIERGEQTRGREVIRLPTTSNS--SDPNDPNDGVDMDGDDGGTQTQAAQQQAATAQAQQQ |
| MgRmi1 | 108 | LEAVARGELTKGRQIIRLRDDG-----AEEEEGEGVGDVPPEEGARRQQRSGGDAAAA     |
| SpRmi1 | 101 | LNDLEELKCLKGQKVIIRLVHD-----ESGDEEQNDDDLTEAQQDAVQKQSE----       |
| III    |     |                                                                |
| KlRmi1 | 123 | NYTNNKDAGNLNQHVVYKLIILQDKKGNLFYAINLDPITPAALK-----TCFLGSKLI     |
| AgRmi1 | 121 | -----AVYKLTLODKSGGLFYAMNVEAIGALK-----TVMLGAKLV                 |
| Rmi1   | 139 | AAKN-----KAVFKLTLOSKSGDVFFAINSTPISWS-----SCMLGSKIV             |
| CaRmi1 | 78  | KLY-----LEDVSTKKITQAYENEPLRFLRTENTSTPL-----PIKLGGLT            |
| NcRmi1 | 179 | AQQAK---DRKNATHKITLODCSGQRLYALELKRITETIAVPQFVNGKMGVGGTPIGCKLL  |
| MgRmi1 | 161 | RATAGGPAVSDKNATHKLVVQDCAGNKFFALELRRIERLG-----IGKANIGEKML       |
| SpRmi1 | 147 | -----LKKMCRLILEDSNGQRFWGLERKPIKGIQ-----LSTKLGTKLL              |
| III    |     |                                                                |
| KlRmi1 | 172 | ILPGAKFNRCMFTFNNSTVKLMYGLIQQWVNDGKLOKVTEYLQNELDSQNPTLNANGKRN   |
| AgRmi1 | 157 | ILPGAVFNRGIFLLTASTVRLFLGLIPSWNGGKEHKVCAYLECLLEER-VATGSGKRKR    |
| Rmi1   | 179 | ILPGTVFNRGVFIKDSQVIFLGGINRVWNNENRDQKFCDYLESKLQDKQLVNGGSKKRK    |
| CaRmi1 | 120 | VLKGIASIVNGVLLLTNKNCEYHG-----IHADDASYVSILNDGVIKKQIELLQL-----   |
| NcRmi1 | 235 | LRKGTKVARGVLLLEPGRVKVLGGRVEGWGRVWEQGRFERVRGEVQAQRG-----        |
| MgRmi1 | 212 | IKAGTVIARGTVLLEPEKCVILGGRVEVWVKAWLEGLRLARLKEAAGTSGSENGR-----   |
| SpRmi1 | 186 | VKN-VLVRRGVLMMLDPNNTTILGGSIEEWQDKDYFPKRLIEELKGELSCTKA-----     |
| KlRmi1 | 232 | ---                                                            |
| AgRmi1 | 216 | ---                                                            |
| Rmi1   | 239 | AND                                                            |
| CaRmi1 |     | ---                                                            |
| NcRmi1 |     | ---                                                            |
| MgRmi1 |     | ---                                                            |
| SpRmi1 |     | ---                                                            |

**Figure S5.** ClustalW alignment of yeast Rmi1 homologues. *Saccharomyces cerevisiae* Rmi1 (ScRmi1, Accession number NP\_015301) is aligned with Rmi1 homologues from *Kluveromyces lactis* (KlRmi1, XP\_453604), *Aschbya gossypii* (AgRmi1, AAS53829), *Candida albicans* (CaRmi1, EAK98148), *Neurospora crassa* (NcRmi1, EAA29355), *Magnaporthe grisea* (MgRmi1, EAA51673), and *Schizosaccharomyces pombe* (SpRmi1, CAA93226). Identical amino acids are shaded black and similar amino acids are shaded grey, at positions where the identity or similarity is shared by at least four of the homologues. Regions of extensive sequence similarity are designated I, II, and III.

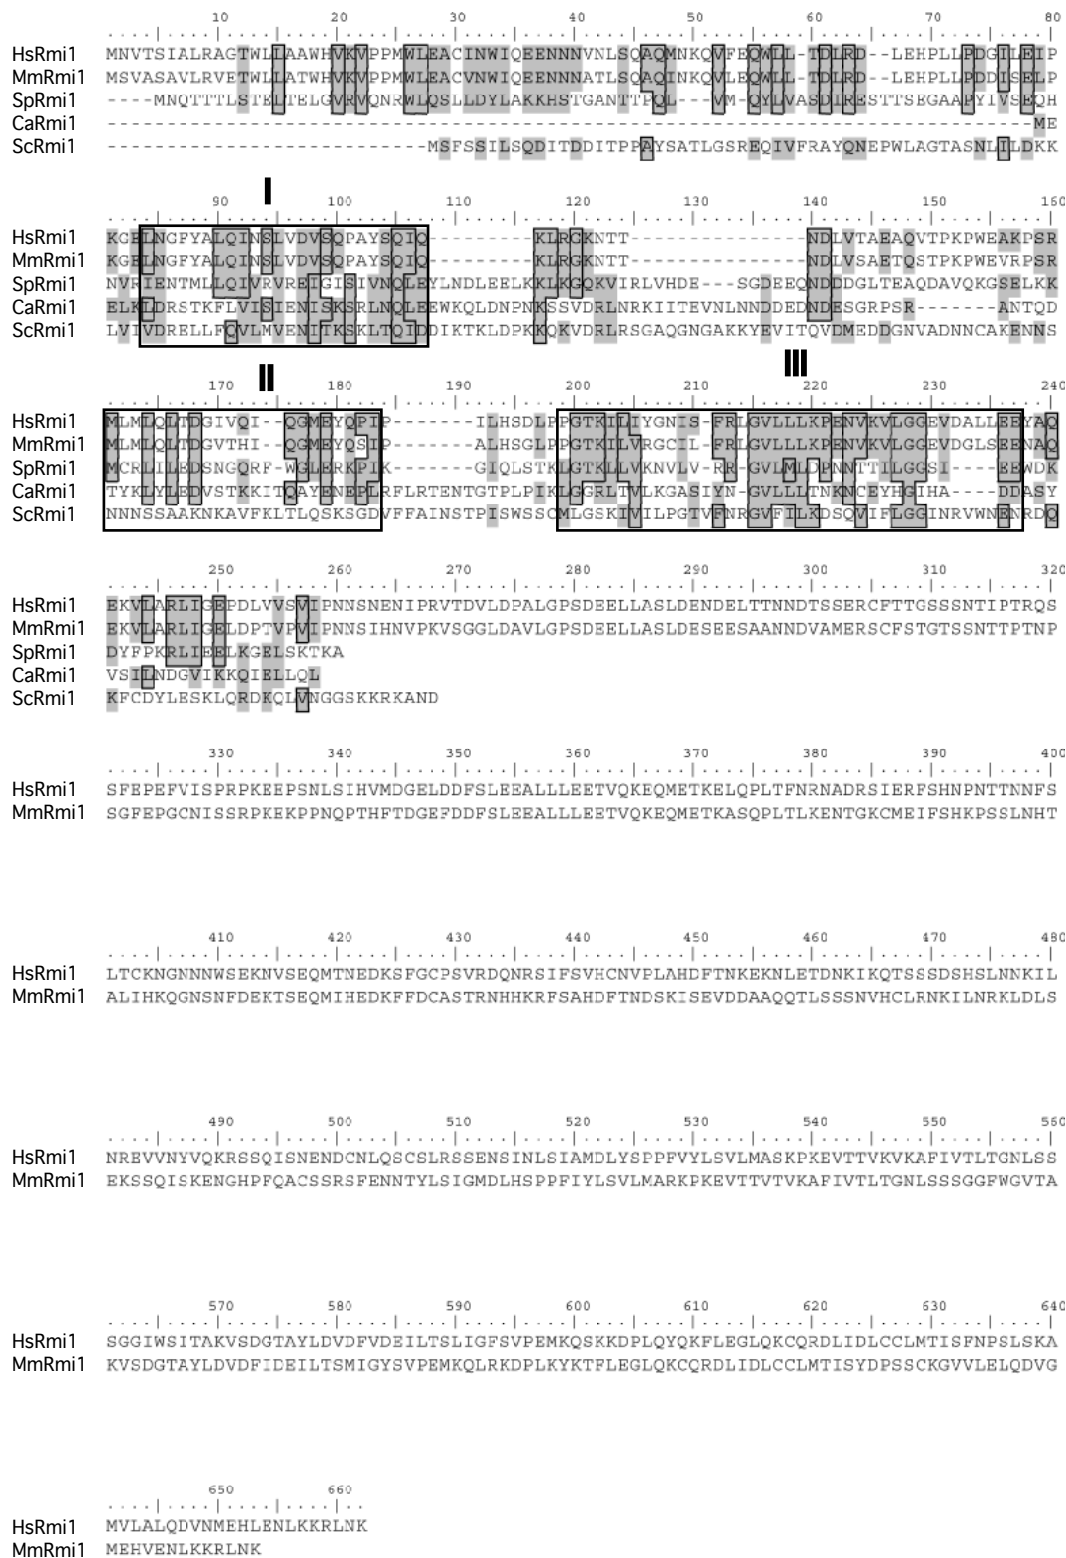

**Figure S6.** Alignment of Rmi1 homologues. *Saccharomyces cerevisiae* Rmi1 (ScRmi1, Accession number NP\_015301) is aligned with Rmi1 homologues from *Candida albicans* (CaRmi1, EAK98148), *Schizosaccharomyces pombe* (SpRmi1, CAA93226), human (HsRmi1, NP\_079221), and mouse (MmRmi1, NP\_0833180). Identical amino acids are boxed in black and similar amino acids are shaded grey, at positions where the identity or similarity is shared by at least three of the homologues. Regions of extensive sequence similarity from the yeast analysis are designated I, II, and III.
